# Supplementary material for: Deciphering the differences in aroma components of tobacco from different origins based on HS-GC-IMS and multivariate statistical analysis
Source: Royal Society of Chemistry journal article supplement (doi:10.1039/d5ay00531k), 2025-01-01
Supplement: d5ay00531k1.xlsx [file d5ay00531k1.xlsx]

## Sheet: sheet1
		Peak volume (peak intensity)
	Odor description	P1	P1	P1	P2	P2	P2	P3	P3	P3	P4	P4	P4	P5	P5	P5
Geranyl acetate	fresh and sweet lemon, fruity, sweet rose, lavender	502.046	581.776	523.955	727.942	705.786	687.41	817.886	830.595	826.031	551.835	528.608	540.248	734.377	674.503	657.851
Acetophenone	sweet, spicy, almond	457.461	438.173	445.721	324.307	337.951	364.491	443.91	471.218	507.274	332.886	299.019	296.932	380.495	322.599	358.645
1-Methyl-2-pyrrolidinone	Slightly ammoniacal	1190.65	1233.71	1242.81	1220.52	1189.12	1204.83	1169.32	1184.46	1185.49	1215.48	1246.58	1257.03	1285.95	1302.12	1248.01
2-Acetylthiazole	popcorn, stir fried chestnuts, roasted oatmeal, roasted meat, nutty, bread	404.777	421.212	449.324	536.677	598.426	609.113	401.149	373.021	379.213	366.833	370.881	390.364	362.096	396.334	368.777
gamma-Butyrolactone	cream, fat, caramel	3110.28	3190.48	3273.31	2642.83	2663.61	2606.53	2469.73	2549.31	2597.98	2759.03	2811.35	2792.92	3188.1	3171.31	2992.37
Butanoic acid	strong acetic acid, cheese, butter, fruity	1224.5	1338.61	1445.63	4901.42	5542.2	6222.22	2270.51	1935.58	1915.41	1928.19	1895.04	1954.81	2021.99	2025.73	2006.77
Tetrahydrothiophen-3-one	onion, garlic, meaty, vegetable, cream	310.681	316.466	350.294	418.106	435.698	492.212	468.501	461.711	461.409	308.686	322.848	305.495	331.302	326.314	303.076
Propanoic acid	yogurt, vinegar	2318.15	2421.46	2471.47	2515.49	2544.98	2451.98	2914.3	3018.96	3084.5	2420.23	2431.04	2399	2790.69	2747.94	2723.65
2-Methylpropanoic acid	yogurt, rancid cream	995.022	1079.52	1152.71	2165.03	2366.68	2578.05	1411.7	1338.44	1411.57	1317.39	1309.29	1367.47	1310.82	1292.78	1232.58
Benzaldehyde	bitter almond, cherry, nutty	531.672	516.492	537.71	615.523	618.549	650.085	579.558	608.584	619.758	784.761	835.396	791.917	554.936	576.068	520.427
2-Ethyl-1-hexanol	citrus, fresh floral, greasy	211.337	199.201	206.087	212.412	196.046	242.173	201.761	235.79	219.067	228.82	202.252	218.118	233.124	216.098	223.43
Acetic acid-M	spicy	21424.8	21875.5	22088.6	22322.9	22260.1	22635.4	23017.5	23229.4	23356.8	23261.3	23254.5	23356.3	23477.9	23634.1	23726.6
Acetic acid-D	spicy	9185.82	9609.47	10247.5	11949.4	12281.6	11954.1	9464.45	9202.33	9189.06	8366.57	8319.02	8299.09	10373.6	10416.2	10249.1
1-Heptanol	grape, fruity, wine, violet, peony	79.0144	86.3264	78.6345	97.0667	103.301	91.3633	131.483	121.795	131.887	87.1951	88.1727	78.6789	79.5832	78.419	76.8348
2,4-Hexadienal	sweet, green, floral, citrus	103.201	122.011	115.514	119.06	130.534	130.352	126.666	125.788	126.117	132.116	130.858	123.924	119.134	124.195	119.889
Dipropyl disulfide	sulfury, onion	59.1825	57.8205	55.7831	158.686	155.269	154.785	75.0729	90.0457	85.18	110.04	119.114	120.347	102.877	97.511	93.8117
2,3,5-Trimethylpyrazine	roasted potato, peanut, cocoa, chocolate	106.765	107.414	105.954	133.413	130.658	120.733	148.277	141.472	139.123	104.03	115.483	109.149	86.6108	80.8407	93.8228
(Z)-3-Hexenol	green, herb	187.363	198.186	182.38	235.537	232.175	230.727	370.985	372.012	370.585	242.749	221.157	222.486	151.059	160.151	150.477
Nonanal	rose, citrus, strong oily	339.549	346.47	358.814	384.125	399.627	403.162	383.105	389.1	385.858	347.79	355.961	364.255	365.406	347.792	357.448
3-Ethylpyridine	tobacco, leather	117.658	135.962	126.843	126.19	134.778	120.087	142.183	147.1	150.839	113.29	122.611	126.655	106.612	105.712	105.467
2,3-Dimethylpyrazine	nutty	59.658	53.8235	63.2262	64.0105	66.5834	64.2371	77.7813	80.9541	80.4964	67.732	67.241	66.1257	48.8688	48.8355	48.9844
6-Methyl-5-hepten-2-one	citrus, fruity, mouldy, ketone	234.453	236.51	252.258	154.332	156.6	172.722	145.711	157.631	153.374	163.366	172.235	170.233	220.904	224.359	232.064
cis-2-Penten-1-ol	green, plastic, rubber	664.72	672.024	668.358	740.447	737.665	736.374	948.257	956.918	940.539	597.888	598.948	600.397	448.433	456.445	426.52
1-Hydroxy-2-propanone-M	pungent, caramel, fresh	1862.97	1890.36	1894.73	2181.12	2206.82	2243.99	2079.81	2088.55	2090.95	2009.57	2007.59	2022.22	2007.87	2024.03	1972.99
1-Hydroxy-2-propanone-D	pungent, caramel, fresh	316.249	332.732	346.123	495.854	504.916	515.452	427.702	420.356	430.772	382.983	392.581	399.025	385.403	391.395	371.89
3-Hydroxy-2-butanone-M	butter, cream	2325.62	2356.52	2337.43	1792.78	1776.46	1804.84	1973.6	1979.54	1970.46	1689.88	1704.77	1711.26	1563.68	1571	1530.33
3-Hydroxy-2-butanone-D	butter, cream	1209.93	1245.29	1255.75	620.5	614.37	616.449	779.708	774.369	760.738	517.79	527.73	527.015	429.535	430.781	411.007
Octanal	aldehyde, waxy, citrus, orange, fruity, fatty	38.6796	39.5061	42.5833	52.697	48.2067	56.6718	55.0655	47.9801	53.7568	47.9134	48.3934	57.3117	53.5169	49.8175	54.8455
3-Methyl 3-butenol	sweet, fruity	106.169	103.432	100.83	161.848	164.597	161.048	201.216	206.704	203.82	138.586	133.256	137.497	87.144	87.3307	81.4829
1-Pentanol-M	balsamic	388.398	408.634	409.738	525.217	536.351	544.063	643.509	639.458	634.986	512.037	510.789	519.914	326.514	330.546	324.938
1-Pentanol-D	balsamic	37.8908	38.5752	44.1319	58.296	65.2769	56.2097	83.1959	78.1079	79.0255	54.9388	58.0427	58.1316	37.7309	33.3961	31.612
4-Hexen-3-one	pungent, spicy	18.1522	17.3168	15.986	14.8528	14.1707	14.8262	14.7617	14.0908	15.5327	16.9613	17.9278	16.3481	20.9073	19.4342	21.2294
(E)-2-Hexenal-M	green, banana, fat	524.722	534.573	545.422	248.95	249.419	254.804	245.739	244.133	244.573	302.391	303.451	305.102	449.264	445.125	459.089
Ethyl hexanoate	pineapple, fruity, wine	69.3984	71.027	67.1544	71.498	70.7715	71.2892	58.707	64.8414	67.1944	66.8855	64.9903	70.1272	60.9866	60.8422	57.1806
3-Methyl-1-butanol-M	whiskey, banana, fruity	1869.89	1890.2	1905.75	2378.94	2400.72	2397.82	2523.81	2524.56	2524.72	2289.55	2279.48	2292.02	1827.14	1831.6	1787.19
3-Methyl-1-butanol-D	whiskey, banana, fruity	821.563	854.421	854.672	1694.77	1736.72	1719.23	2096.88	2108.2	2075.28	1400.01	1391.85	1403.37	748.903	737.767	674.457
3-Methyl-2-butenal-M	fruity	215.903	220.126	227.772	149.906	152.161	154.801	174.597	168.3	169.336	161.668	164.568	164.503	165.592	162.028	162.715
3-Methyl-2-butenal-D	fruity	34.4604	32.8384	33.6383	22.1448	25.3376	22.1782	31.3676	30.2722	31.752	26.1463	26.3352	23.0091	21.6916	21.5116	20.514
Isobutyl 3-methylbutanoate	Sweet fruity	101.206	109.282	113.23	96.4757	97.8687	97.8687	86.893	87.4684	91.1055	92.3786	92.9808	99.8417	92.1942	92.6186	95.7002
o-Xylene	geranium	197.033	172.937	158.262	168.016	173.297	172.939	161.006	174.026	174.979	170.044	175.29	175.877	177.823	175.61	180.511
1		21.9449	19.7964	17.5723	16.0526	17.5568	15.8815	15.5572	14.0663	15.4816	16.7503	14.344	15.686	20.5074	15.8838	19.1609
Methyl hexanoate-M	pineapple, apricot, fruity	237.803	247.588	254.902	202.756	200.75	200.143	199.052	191.089	193.756	212.266	209.77	208.484	182.211	181.989	173.41
Methyl hexanoate-D	pineapple, apricot, fruity	53.8835	45.0073	51.5706	43.7209	46.3693	37.8775	33.2272	36.8555	36.7755	43.1832	38.9817	37.0954	36.9977	36.5422	32.7807
1-Penten-3-ol	ethereal, green, tropical fruity	1574.79	1605.28	1630.38	1079.88	1061.92	1058.4	1043	1031.57	1007.71	1109.89	1092.02	1129.6	1070.13	1080.25	1058.25
alpha-Terpinene	woody, lemon, citrus	144.071	142.269	147.582	128.141	125.799	126.683	113.926	115.632	114.621	125.159	124.593	123.511	143.358	142.692	142.387
3-Heptanone	Fruity, Grass, Oil	182.6	173.635	176.781	186.644	188.33	183.917	172.191	169.604	170.689	168.891	162.39	159.584	164.101	166.478	167.114
1-Butanol-M	wine	2176.92	2215.98	2225.67	2176.83	2161.8	2152.65	2173.6	2167.85	2152.24	2176.75	2171.51	2163.23	2049.52	2049	1998.5
1-Butanol-D	wine	758.546	787.602	806.877	741.746	765.149	723.652	693.833	667.989	642.951	666.638	666.978	635.626	599.315	583.064	537.439
Butyl propanoate	earthy, sweet rose	198.695	200.083	203.569	180.245	179.458	179.834	176.699	172.593	169.371	186.37	182.278	177.325	171.622	175.761	166.514
(E)-2-Pentenal-M	potato, peas	560.933	579.409	602.641	402.746	400.393	423.034	319.27	318.015	325.483	392.806	402.9	415.419	494.989	491.99	512.04
(E)-2-Pentenal-D	potato, peas	565.963	561.397	573.384	290.371	295.895	302.956	229.991	235.99	239.085	321.223	328.064	327.487	373.645	371.852	369.67
Diallyl sulfide-M	garlic	2322.32	2321.89	2317.84	2503.43	2483.16	2509.59	2443	2470.62	2484.82	2422.26	2444.38	2433.05	2471.92	2473.32	2471.6
Diallyl sulfide-D	garlic	7924.41	8011.99	8015.89	7746.97	7753.06	7691.96	8048.32	8008.43	7915.73	8140.3	8147.16	8130.04	7778.15	7781.23	7595.69
2-Pentanol	Fusel Oil, Green	51.6439	49.5509	51.3639	94.2339	95.3181	93.654	103.75	108.356	108.878	56.8629	63.2551	61.2488	37.5198	38.9418	36.5489
3-Penten-2-one	Fruity, turns into spicy during storage	129.805	131.925	137.248	130.674	132.356	133.989	189.519	194.276	201.01	164.799	169.205	177.747	173.248	177.587	179.667
2-Propenyl propyl sulfide	garlic, onion	35.0091	32.6385	33.3561	34.8869	34.827	39.4839	44.3585	46.5093	45.0784	40.4704	41.6724	45.9427	44.2719	42.4056	43.6476
2-Methyl-1-propanol	fresh, alcoholic, leather	331.61	332.637	326.031	432.727	443.321	434.209	545.187	547.531	538.59	381.821	386.451	376.98	278.585	281.013	264.3
Hexanal-M	fresh, green, fat, fruity	617.331	648.835	669.462	344.315	350.949	350.12	370.883	365.791	370.843	397.461	403.631	409.563	563.315	560.842	580.34
Hexanal-D	fresh, green, fat, fruity	70.3182	81.5229	92.1587	27.1328	30.5255	32.4363	38.0597	36.1401	35.5135	40.7548	37.9664	43.1699	62.1664	63.1484	64.7637
Butyl acetate-M	fruity	225.468	237.297	239.701	144.991	144.805	142.638	95.4181	94.2383	93.6029	110.582	100.315	116.085	126.781	125.666	116.503
Butyl acetate-D	fruity	17.0502	14.9017	14.4396	15.2772	16.1948	16.2926	11.1291	11.8089	13.7708	11.8823	12.531	13.9997	12.7154	13.0843	14.7195
2,3-Pentanedione	sweet, cream, caramel, nuts, cheese	124.775	125.017	123.166	137.484	138.195	146.653	89.5325	85.5443	90.2635	143.905	141.783	142.354	265.502	263.241	267.364
1-Propanol	alcohol, pungent	251.183	258.279	261.37	213.994	212.91	205.818	292.135	289.456	281.164	217.956	219.509	215.736	195.902	185.537	184.566
2		174.684	176.728	174.71	142.487	144.003	143.029	164.785	167.278	169.916	159.422	157.478	155.269	206.029	205.98	198.135
1-Penten-3-one-M	strong pungent odors	1595.79	1622.29	1623.82	1513.43	1492.32	1476.11	1456.06	1449.36	1450.71	1551.83	1557.25	1560.84	1599.64	1599.57	1596.01
1-Penten-3-one-D	strong pungent odors	3252.22	3259.89	3277.01	2214.33	2231.15	2254.15	2038.29	2050.32	2052.87	2529.03	2535.08	2553.47	3056.65	3047.18	2980.15
Acrylonitrile	pungent, onion, sweet	1327.85	1336.8	1362.66	1450.73	1500.26	1551.64	1440.11	1448.78	1462.61	1406.34	1403.75	1412.83	1429.46	1419.91	1412.3
2-Butanol	fruity	69.8561	69.3984	68.5386	107.043	108.078	107.856	115.643	120.065	120.058	81.6339	80.8919	85.2088	58.2116	60.9533	54.4922
Ethyl butanoate	pineapple, fruity, ester, whiskey	79.2144	76.5282	75.1085	66.2456	64.9348	64.0394	78.2746	78.7367	73.1733	76.7682	79.3632	75.9039	68.8963	70.807	69.8428
3		203.476	199.692	196.013	244.269	265.718	286.143	288.556	289.187	284.237	256.722	259.29	261.712	252.472	244.671	245.675
4-Methyl-2-pentanone-M	ketone	111.917	114.719	110.877	72.9022	76.5126	76.2971	144.767	153.852	157.04	111.811	114.868	111.686	147.986	149.502	145.778
4-Methyl-2-pentanone-D	ketone	27.1128	26.7529	23.7334	24.7843	25.7842	24.671	31.6098	32.2985	31.752	27.4727	26.3774	24.7532	32.0852	31.2143	37.9575
4		141.967	141.894	149.47	144.631	143.143	145.538	192.776	189.847	198.824	181.731	189.721	200.785	203.523	211.088	211.85
Pentanal	green grassy, faint banana, pungent	2573.43	2839.29	2981.46	3237.95	3466.48	3700.28	2570.46	2528.34	2645.01	2928.9	3047.26	3034.78	3510.7	3488.15	3727.41
Ethyl isobutyrate	sweet, fruity, alcoholic, rummy	2519.7	2541.35	2553.71	1485.49	1491.07	1491.94	1273.23	1281.85	1281.68	1702.27	1704.07	1707.13	2070.64	2077.72	2033.56
Ethyl propanoate	grape, pineapple, fruity, rum	128.801	130.854	127.152	129.618	125.601	130.149	124.419	126.168	124.906	145.547	150.979	146.502	133.178	135.717	127.199
Butyl ether-M	ether	101.557	107.785	109.253	124.317	120.405	116.265	123.375	127.097	134.618	132.616	130.858	136.06	127.908	125.626	121.191
Butyl ether-D	ether	55.2477	55.421	58.8448	45.0073	43.9431	48.0623	45.2406	50.2708	45.5917	51.986	50.7129	52.4215	49.7309	53.8413	53.0458
Ethanol	aromaticity	3619.75	3558.88	3674.37	4194.38	4134.18	4214.61	3919.89	3948.99	3889.26	3743.07	3767.91	3820.5	3731.23	3698.4	3755.72
2-Propanol-M	alcohol, spicy	491.03	490.335	487.711	484.902	473.64	469.883	406.794	380.697	373.769	410.765	412.978	416.015	366.744	367.008	363.336
3-Methylbutanal	chocolate, fat	312.994	328.938	327.573	270.555	276.616	274.503	327.16	354.373	367.624	425.669	442.263	456.639	640.178	649.388	657.411
2-Butanone	fruity , camphor	635.815	650.396	661.288	647.33	674.392	709.866	903.595	933.809	964.983	843.181	888.093	923.982	1020.67	1040.35	1081.01
Ethyl acetate	fresh, fruity, sweet, grassy	187.337	212.677	215.012	2590.25	2511.12	3145.66	2275.07	2739.46	2799.24	508.882	534.462	642.525	174.964	171.153	182.38
Acetal	floral, fruity	2068.6	2021.85	2057.58	1997.54	1981.7	1890.55	2457.55	2463.48	2436.17	2532.97	2488.49	2381.97	2291.81	2252.98	2232.59
2-Methylfuran	chocolate, ether like odor	247.415	275.212	280.637	188.146	184.266	177.496	297.326	288.692	289.891	281.526	294.915	325.496	273.154	284.897	286.148
Methyl acetate	ethereal	2220.13	2376.9	2432.19	5553.85	5635.14	5507.78	5704.57	5823.69	5816.88	3435.77	3401.11	3379.48	1360.15	1361.07	1295.51
Acetone	fresh, apple, pear	3693.17	3681.31	3703.74	2658.25	2687.27	2760.8	3313.85	3342.64	3377.75	3814.36	3876.53	3922.85	4999.17	5007.91	5047.42
2-Methylpropanal	banana, melon , slightly nutty	158.282	161.944	161.657	382.501	379.828	385.836	221.995	226.028	230.089	259.028	260.306	263.194	273.901	269.942	276.469
Propanal	pungent, green grassy	3193.7	3246.36	3331.41	1824.25	1846.77	1916.02	2104.08	2160.75	2178.49	2270.63	2283.58	2290.95	2789.91	2789.19	2816
Dimethyl sulfide	cabbage, sulfur, gasoline	1544.78	1581.16	1598.29	607.113	614.516	629.64	1214.8	1250.86	1271.9	664.949	667.324	670.231	577.785	590.203	597.295
Acetaldehyde	green, slight fruity	3308.43	3283.23	3249.23	3404.05	3342.97	3485.8	3410.53	3617.49	3676.98	3662.26	3668.83	3610.55	3848.96	3776.91	3827.81
5		240.596	249.39	245.377	117.39	122.162	116.65	121.758	127.619	123.688	149.033	148.879	140.272	182.887	182.449	179.114
Ethylbenzene	Aromatic odor	14.7262	19.4875	20.4118	19.7319	19.8808	20.3118	27.6527	25.4398	23.6223	22.0804	21.7382	22.1026	19.9208	23.6801	20.0141
6		718.433	746.672	757.152	899.384	918.692	988.912	907.709	952.292	970.209	919.305	907.674	923.853	907.234	922.38	920.785
3-Pentanol	Fusel Oil, Green	56.3119	48.9421	48.5222	36.6488	39.1306	36.24	64.8481	68.2386	67.3654	37.3754	41.3169	40.6792	37.4376	39.5883	40.8436
Isoamyl acetate-M	sweet, banana, fruity	45.0962	46.7892	49.4243	131.723	144.438	148.686	181.222	188.323	191.485	56.1675	54.3078	63.5239	42.0501	39.0995	37.7242
4-Methyl-3-penten-2-one	spice, earth, green	178.558	176.457	185.844	66.1279	64.1638	68.2875	50.5796	52.617	55.8831	66.6278	64.9814	66.6433	71.949	68.783	70.4271
cis-3-Hexenyl acetate	fresh green grassyy, sweet, fruity, banana	40.9592	41.6035	44.8429	68.843	64.0572	67.4921	93.3829	96.9511	89.2703	57.3984	58.6915	62.1331	43.1899	43.5676	41.0458
2-Pentylfuran	bean, fruity, earthy, green, vegetable	22.4648	25.522	23.0491	29.5035	26.2907	30.0367	41.2924	36.2067	37.5731	39.515	33.8471	36.4022	24.3822	29.2569	24.9843
(Z)-4-Heptenal	grass, oil	75.2507	73.2555	73.4976	44.4807	47.4446	44.2608	42.4189	48.3956	44.4296	48.5422	48.5467	53.6524	55.1077	58.6804	52.3837
Phenylacetaldehyde	hyacinth, sweet fruity, almond, cherry, clover honey, cocoa	346.472	351.2	385.327	641.523	552.812	555.807	383.061	373.614	404.068	387.162	303.378	319.442	394.825	385.796	342.142
1-Hexanol	fresh, fruity, wine, sweet, green	57.1606	66.2745	62.3597	83.1048	83.978	82.3582	100.908	105.356	105.754	74.2908	68.8674	72.8333	58.9425	58.0982	48.8577
2-Propanol-D	alcohol, spicy	1700.87	1708.75	1733.38	1801.31	1804.09	1901.54	1855.64	1848.99	1844	1631.73	1633.84	1653.13	1625.99	1622.6	1642.81
2,5-Dimethylfuran	meaty, roast beef, bacon	22.7314	24.0001	25.6931	19.7764	18.0611	15.7816	32.0119	34.0427	35.569	30.7233	28.8947	29.068	47.8401	47.2913	49.3332
7		1031.62	1067.73	1081.52	1176.31	1149.49	1190.54	1107.03	1097.28	1097.47	1042.33	1035.95	1046.61	1028.6	1082.81	1079.42
2,5-Dimethylpyrazine	nutty, peanut, mouldy, earthy, potato, fatty, cocoa powder	72.2979	77.3992	77.9346	49.9131	52.9503	52.1149	52.9348	54.7189	54.4256	51.1506	47.729	49.7109	39.9149	53.5946	45.0318
2-Methylpyrazine	nutty, mouldy, roast, earthy	81.8406	85.4021	89.3703	107.343	111.051	116.361	104.743	102.701	105.876	97.6532	99.7728	95.9624	100.191	102.297	104.339
3-Butenenitrile	scallion	37.482	32.6474	34.1382	35.1758	37.3709	36.4378	35.8223	34.0138	34.0115	33.9005	31.7742	30.5144	32.2363	28.5548	27.8216
Isoamyl acetate-D	sweet, banana, fruity	31.9119	25.4953	24.1	24.9643	33.4761	35.6068	32.3763	34.4692	30.3167	19.2343	29.8279	26.2419	23.7112	26.2507	24.4511
Butanal	pungent, fruity, green leaf	521.329	520.165	543.863	357.763	364.969	345.508	334.05	307.424	306.575	452.233	456.599	448.842	504.845	497.702	501.766
5-Methyl-2(3H)-furanone	herb, tobacco	60.4845	52.6348	53.7524	27.7371	35.7223	28.5148	32.774	27.7171	36.8999	40.7437	36.0445	38.3974	55.4943	51.555	45.9449
(E)-2-Hexenal-D	green, banana, fat	99.875	105.698	108.762	27.6505	31.7831	34.3382	30.8966	30.8677	32.8184	35.6357	38.1086	39.9771	71.9002	73.1799	74.5686
8		252.203	255.078	247.648	173.226	180.96	174.759	186.386	181.153	186.852	183.431	187.632	181.347	169.111	169.904	161.588
p-Cymene	fresh citrus terpene woody spice	106.245	105.034	105.865	125.224	126.448	113.846	93.8984	92.3498	87.1263	80.4297	76.2727	74.5819	75.5528	72.5289	69.7717
1,8-Cineole	camphor, refreshing herbal	54.9988	49.5198	45.3961	54.1767	52.1749	53.0081	49.2576	47.6957	47.9557	50.0842	51.5794	45.9338	47.4269	49.0177	44.814
2-Methyl-3-heptanone-M	special spicy	2385.37	2387.81	2397.85	2532.57	2543.04	2541.33	2550.64	2563.46	2556.88	2545.2	2550.29	2546.28	2534.49	2529.74	2544.58
2-Methyl-3-heptanone-D	special spicy	4676.64	4516.84	3983.97	4675.18	4658.86	4701.22	4365.85	4389.08	4430.3	4284.82	4320.39	4154.21	4383.45	4335.8	4374.54
